# Supplementary figures and images for: Discovery of a selective inhibitor of oncogenic B-Raf kinase with potent antimelanoma activity
Source: HighWire-hosted journal article supplement (doi:10.1073/pnas.0711741105), 2008-02-19

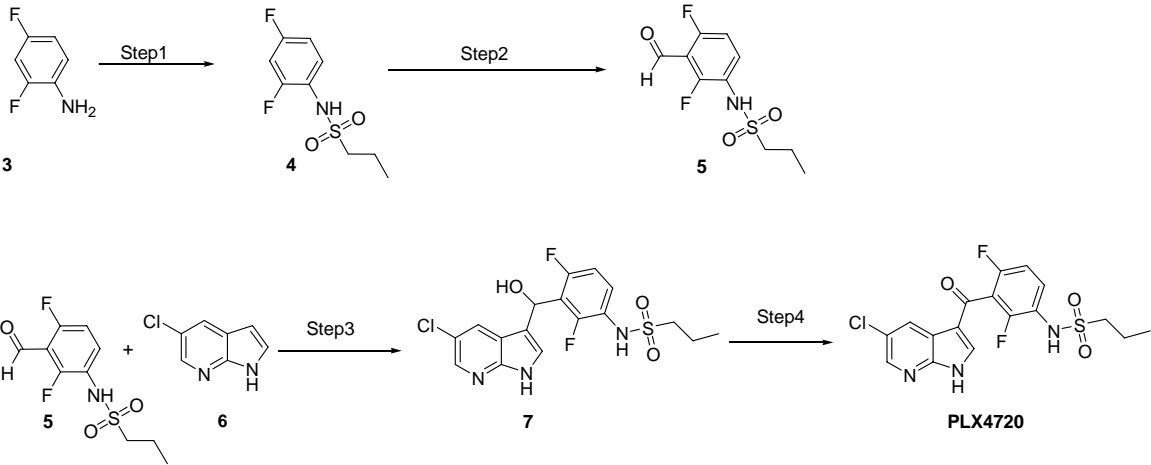

Supplement: 11741Scheme1.pdf [file 11741Scheme1.pdf]
